# Supplementary material for: Mild temperature synthesis of gold nanoplates using polyethyleneimine and their improved surface enhanced Raman signal
Source: Royal Society of Chemistry journal article supplement (doi:10.1039/c4ra05528d), 2014-08-06
Supplement: c4ra05528d1.pdf [file c4ra05528d1.pdf]

Supporting Information for

**Mild temperature synthesis of gold nanoplates using  
polyethyleneimine and their improved surface enhanced Raman  
signal**

Taekyung Yu, Zhao-hui Wu, Woo-Sik Kim\*

*Department of Chemical Engineering, College of Engineering, Kyung Hee University, Youngin, 446-701,  
Korea*

*\* Corresponding authors: E-mail: [wskim@khu.ac.kr](mailto:wskim@khu.ac.kr)*

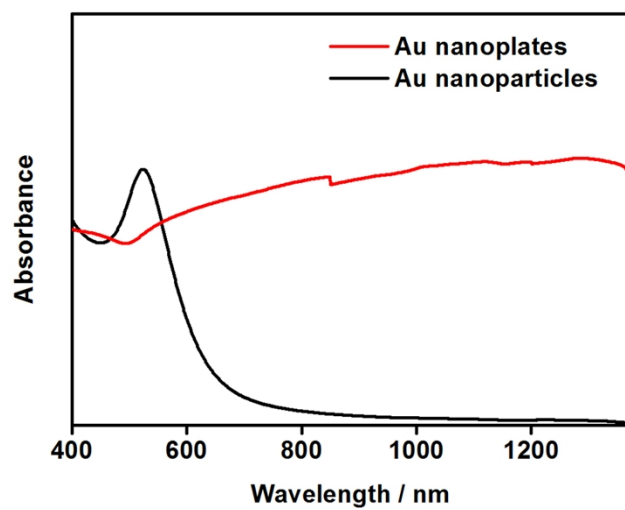

**Fig. S1.** UV-vis spectra of Au nanoplates shown in Fig. 1 and Au nanoparticles shown in Fig. 4(a).

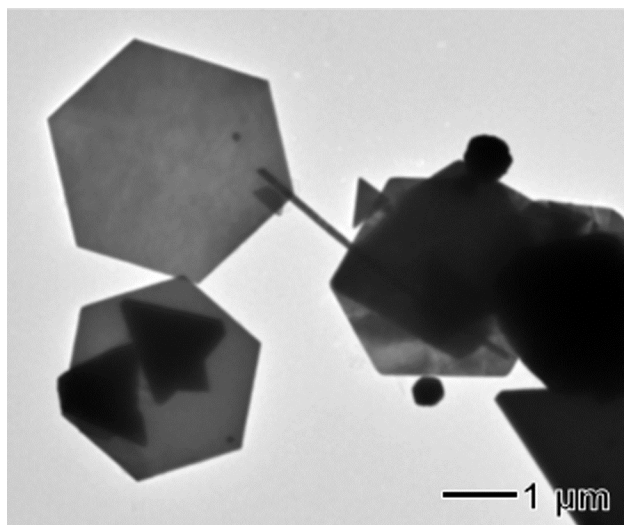

**Fig. S2.** TEM image of a sample prepared under same conditions as those in Fig. 1, except synthesis was conducted in presence of BPEI having smaller molecular weight (MW ~ 25,000) instead of BPEI (MW ~ 750,000).

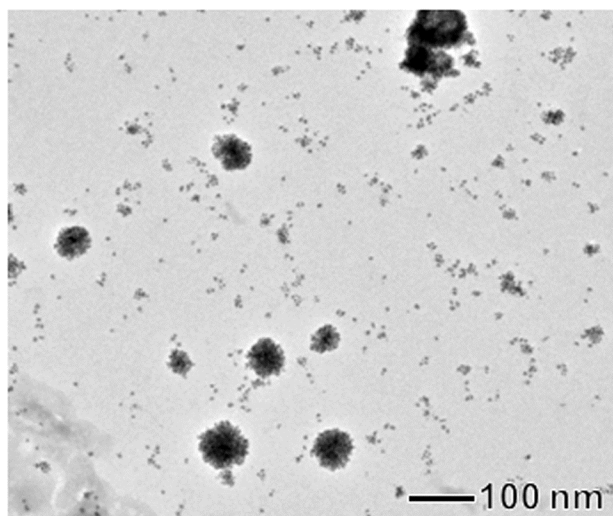

**Fig. S3.** TEM image of sample prepared under same conditions as those in Fig. 1 except synthesis was conducted in absence of BPEI.

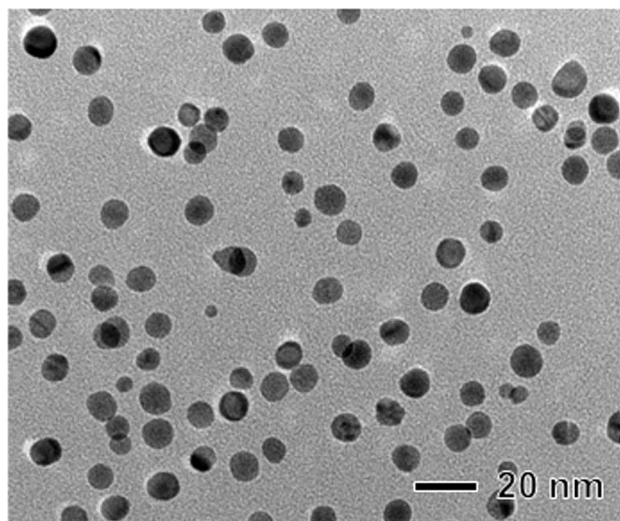

**Fig. S4.** TEM image of Au nanoparticles synthesized by reacting  $\text{HAuCl}_4$  and BPEI.
